# Supplementary material for: Modeling Formamide Denaturation of Probe-Target Hybrids for Improved Microarray Probe Design in Microbial Diagnostics
Source: PubMed Central journal article supplement (PMC3428302; doi:10.1371/journal.pone.0043862), 2012-08-27
Supplement: pone.0043862.s006.pdf [file pone.0043862.s006.pdf]

**Table S2.** Extended free energy rules for quadruplets of nucleotide pairs in a DNA duplex.

| Class | Quadruplet <sup>a</sup> | $\Delta G^{\circ b}$ | Description                                                                                                                      |
|-------|-------------------------|----------------------|----------------------------------------------------------------------------------------------------------------------------------|
| 1     | ●●**                    | Table S1A            | Nearest neighbor in the first two positions.                                                                                     |
| 2     | ●^●●                    | Table S1B            | Mismatch loop based on the triplet in the first three positions.                                                                 |
| 3     | ●-●●                    | Table S1C            | Bulged mismatch loop based on the triplet in the first three positions.                                                          |
| 4     | ●^^●                    | Table S1D            | Tandem mismatch.                                                                                                                 |
| 5     | ●^ - ●<br>●-^●<br>●--●  | 1.0                  | Bulged tandem mismatch loop.                                                                                                     |
| 6     | ###●                    | 1.0                  | End of a mismatch series with at least three mismatches.                                                                         |
| 7     | ●#●#                    | 1.0                  | Adjacent mismatch loops interfering with at least four nearest neighbors.                                                        |
| 8     | #**#                    | 0.0                  | No additional penalty since used mismatch loop information is contained in neighboring quadruplets.                              |
| 9     | #●●●                    | 0.0                  | No additional penalty since used mismatch loop information is contained in neighboring quadruplets.                              |
| 10    | ##●●                    | 0.0                  | No additional penalty since used mismatch loop information is contained in neighboring quadruplets.                              |
| 11    | #●#●                    | 0.0                  | No additional penalty since used mismatch loop information is contained in neighboring quadruplets.                              |
| 12    | ●###                    | 0.0                  | Beginning of a mismatch series with at least three mismatches. Penalty is placed at the end of the mismatch series (see Type 6). |

<sup>a</sup> ●, matching pair; ^, base to base mismatched pair; -, gap to base mismatch (bulged mismatch); #, any mismatch; \*, any pair.

<sup>b</sup> For studied conformations, corresponding table of parameters is indicated. For others, approximations are provided in kcal/mol.
